# Supplementary material for: RNA-seq driven expression and enrichment analysis to investigate CVD genes with associated phenotypes among high-risk heart failure patients
Source: PubMed Central journal article supplement (PMC8590246; doi:10.1186/s40246-021-00367-8), 2021-11-13
Supplement: 40246_2021_367_MOESM1_ESM.pdf [file 40246_2021_367_MOESM1_ESM.pdf]

## **Supplementary material 1:**

Gender and age-based population data classification.

### **Title**

RNA-seq driven expression and enrichment analysis to investigate CVD genes with associated phenotypes among high-risk Heart Failure patients.

### **Authors**

Zeeshan Ahmed<sup>1,2,4,5\*</sup>, Saman Zeeshan<sup>3</sup>, and Bruce T. Liang<sup>5</sup>

### **Affiliations**

1. Rutgers Institute for Health, Health Care Policy and Aging Research, Rutgers University, 112 Paterson St, New Brunswick, NJ, USA.
2. Department of Medicine, Robert Wood Johnson Medical School, Rutgers Biomedical and Health Sciences, 125 Paterson St, New Brunswick, NJ, USA.
3. Rutgers Cancer Institute of New Jersey, Rutgers University, 195 Little Albany St, New Brunswick, NJ, USA.
4. Department of Genetics and Genome Sciences, UConn Health, 400 Farmington Ave, Farmington, CT, USA.
5. Pat and Jim Calhoun Cardiology Center, UConn School of Medicine, University of Connecticut Health Center, 263 Farmington Ave, Farmington, CT, USA.

\*Corresponding author: Zeeshan Ahmed, Rutgers Institute for Health, Health Care Policy and Aging Research, Rutgers University, 112 Paterson Street, New Brunswick, 08901, NJ, USA. ([zahmed@ifh.rutgers.edu](mailto:zahmed@ifh.rutgers.edu) and [zahmed@uchc.edu](mailto:zahmed@uchc.edu)).

### Supplementary material 1:

Gender and age-based population data classification.

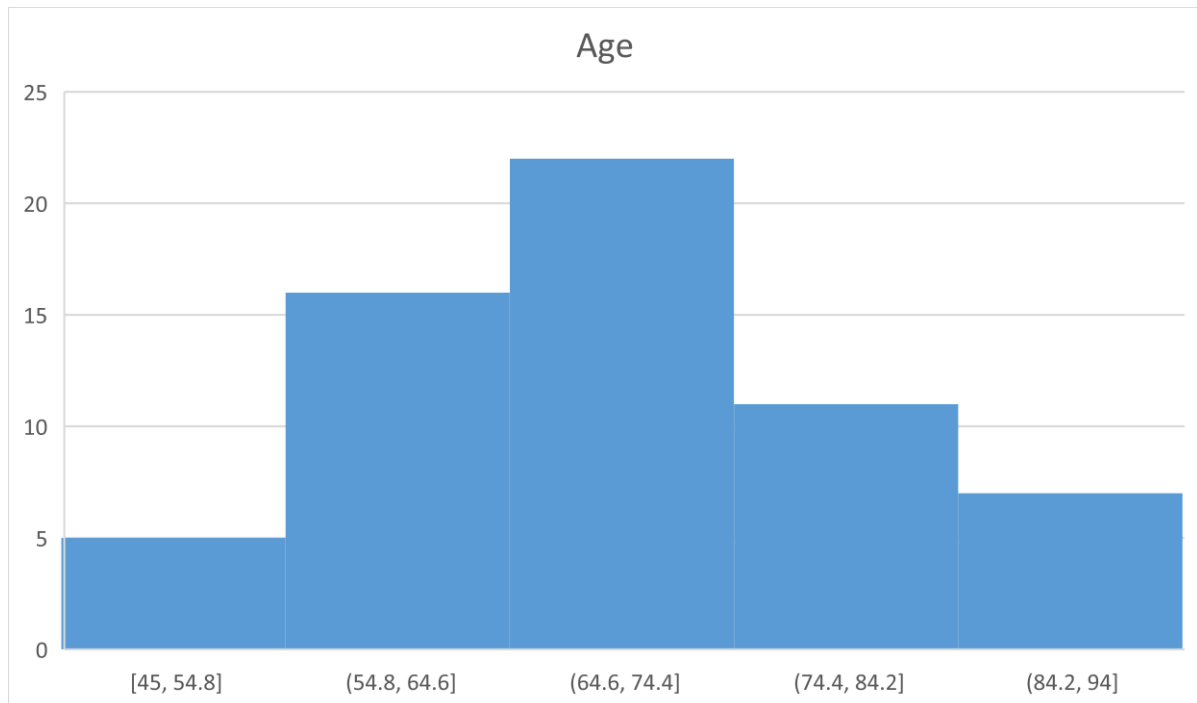

**S1. Figure 1:** Gender and age-based population data classification – Age Female.

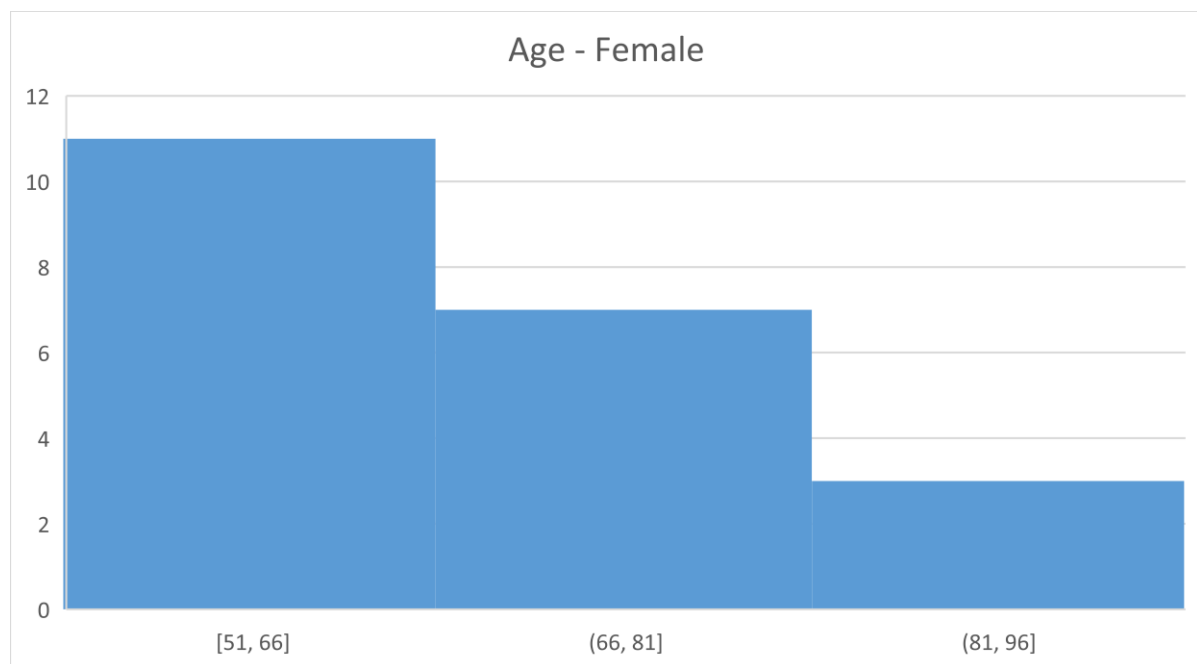

**S1. Figure 2:** Gender and age-based population data classification – Age Female.

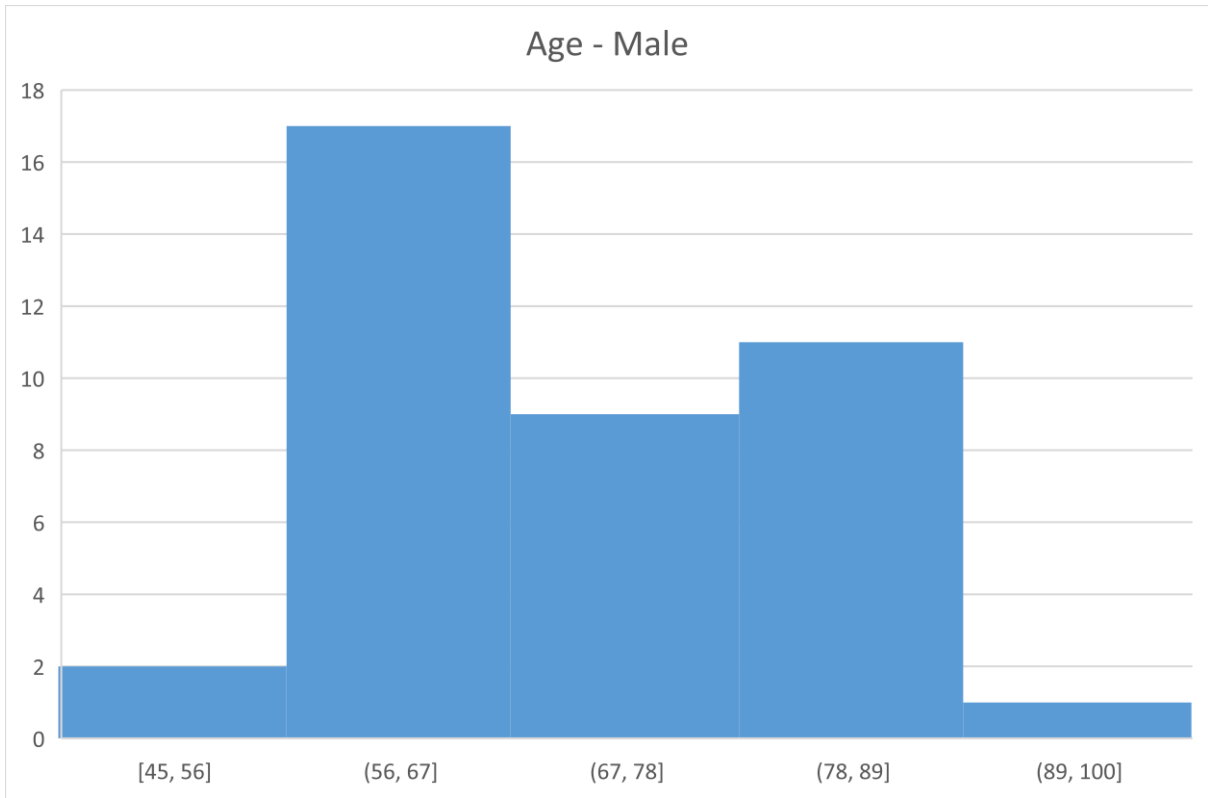

**S1. Figure 3:** Gender and age-based population data classification – Age Male.

| <b>IDs</b> | <b>Gender</b> | <b>Age</b> |
|------------|---------------|------------|
| 1073       | Female        | 89         |
| 1084       | Female        | 69         |
| 1087       | Female        | 69         |
| 1088       | Female        | 65         |
| 1093       | Female        | 70         |
| 1097       | Female        | 57         |
| 1105       | Female        | 71         |
| 1108       | Female        | 57         |
| 1111       | Female        | 86         |
| 1114       | Female        | 54         |
| 1116       | Female        | 63         |
| 1058       | Female        | 72         |
| 1064       | Female        | 54         |
| 1065       | Female        | 51         |
| 1069       | Female        | 65         |
| 1071       | Female        | 52         |
| 1072       | Female        | 91         |
| 1074       | Female        | 81         |
| 1075       | Female        | 59         |
| 1078       | Female        | 72         |
| 1082       | Female        | 59         |
| 1059       | Male          | 79         |
| 1068       | Male          | 70         |
| 1085       | Male          | 64         |
| 1086       | Male          | 65         |
| 1089       | Male          | 55         |
| 1090       | Male          | 70         |
| 1091       | Male          | 77         |
| 1092       | Male          | 62         |
| 1094       | Male          | 64         |
| 1095       | Male          | 66         |
| 1096       | Male          | 59         |

|      |      |    |
|------|------|----|
| 1098 | Male | 83 |
| 1099 | Male | 67 |
| 1100 | Male | 81 |
| 1101 | Male | 64 |
| 1102 | Male | 71 |
| 1103 | Male | 80 |
| 1104 | Male | 73 |
| 1106 | Male | 79 |
| 1107 | Male | 84 |
| 1109 | Male | 75 |
| 1110 | Male | 80 |
| 1112 | Male | 72 |
| 1113 | Male | 60 |
| 1115 | Male | 67 |
| 1117 | Male | 66 |
| 1118 | Male | 88 |
| 1060 | Male | 58 |
| 1061 | Male | 70 |
| 1062 | Male | 67 |
| 1063 | Male | 66 |
| 1066 | Male | 82 |
| 1067 | Male | 62 |
| 1070 | Male | 57 |
| 1076 | Male | 45 |
| 1077 | Male | 73 |
| 1079 | Male | 92 |
| 1080 | Male | 86 |
| 1081 | Male | 57 |
| 1083 | Male | 85 |

**S1. Table 1:** Gender and age-based population data classification.
